# Supplementary material for: Depletion of Arg1-Positive Microglia/Macrophages Exacerbates Cerebral Ischemic Damage by Facilitating the Inflammatory Response
Source: MDPI journal article supplement (doi:10.3390/ijms232113055), 2022-10-27
Supplement: s1 [file s1]

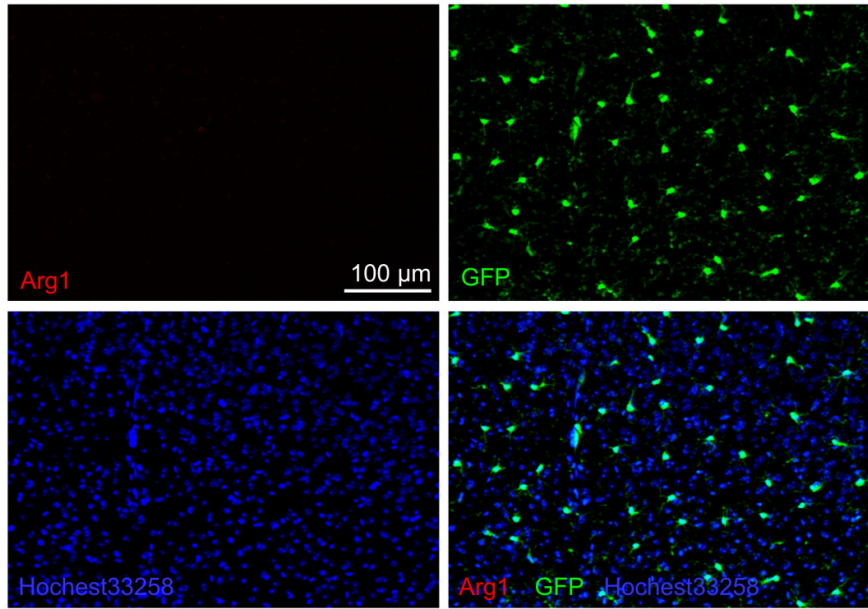

**Figure S1. Arg1 expression in the healthy brain**

No Arg1 immunoreactivity (red) was observed in the contralateral brain without ischemic insult. Microglia (green) distribute evenly in the cerebral cortex of healthy CX3CR1<sup>GFP/+</sup> mice. Cell nuclei were marked with Hoechst 33258.

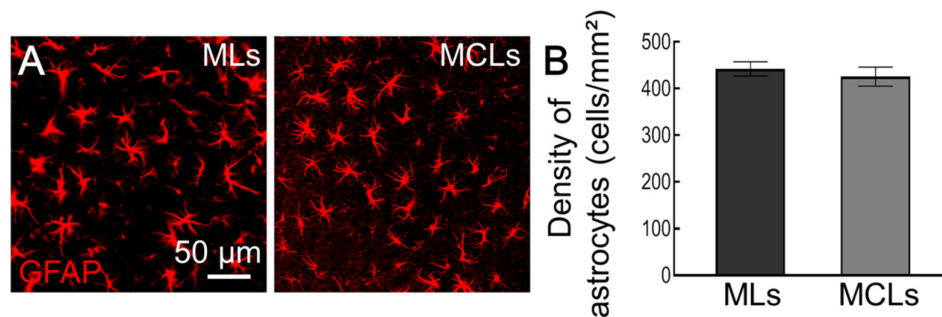

**Figure S2. Distribution of astrocytes after stroke**

(A) Representative images of brain slices showing GFAP<sup>+</sup>-astrocytes with MLs or MCLs after stroke. (B) The density of astrocytes after MLs or MCLs treatment. MCLs had no effect on astrocyte density (n = 3).

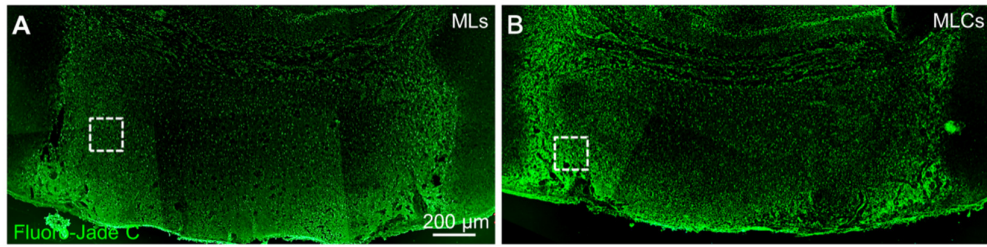

**Figure S3. Distribution of degenerative neurons at the lesion site after stroke**

(a) Brain slice stained with Fluoro-Jade C treated with MLs at 4 days after stroke. (B) Brain slice stained with Fluoro-Jade C treated with MCLs at 4 days after stroke. The higher magnification images of the white box regions are respectively shown in Fig. 3 F.
